# Supplementary material for: Cruciform Formable Sequences within Pou5f1 Enhancer Are Indispensable for Mouse ES Cell Integrity
Source: PubMed Central journal article supplement (PMC8036336; doi:10.3390/ijms22073399), 2021-03-26
Supplement: ijms-22-03399-s001.pdf [file ijms-22-03399-s001.pdf]

# Table S1. Primers used in the study

| Name                    | Sequence (5' to 3')                                                              |
|-------------------------|----------------------------------------------------------------------------------|
| gRNA1-bottom            | CACCGTTATACTCTAGGCACGCTTA                                                        |
| gRNA1-top               | AAACTAAGCGTGCCCTAGAGTATAAC                                                       |
| gRNA2-bottom            | CACCGTGGTGAAGTCGATGAAGCTG                                                        |
| gRNA2-top               | AAACCAGCTTCATCGACTTCACCAC                                                        |
| gRNA3-bottom            | CACCGCCACAAAAGCGATTTCCGAG                                                        |
| gRNA3-top               | AAACCTCGGAAATCGCTTTTGTGGC                                                        |
| gRNA4-bottom            | AAACCAGGCGTGCCCTAGAGTATAAC                                                       |
| gRNA4-top               | CACCGTTATACTCTAGGCACGCCTG                                                        |
| Klcheck-fw              | TTCTAAGAAGACTTGGGACTTCAGAC                                                       |
| Klcheck-rv              | TCTTGATGGTAGTCTTCATCAGGTAG                                                       |
| puro-fw-NcoI            | AATGCCATGGCATCTTGACCATTAGCTCC                                                    |
| puro-rv-XhoI            | ATGCCTCGAGTAGGGAGGAAGAAAGTTTGAT                                                  |
| U6-gRNA-Fw-AflIII       | GCTCACATGTGAGGGCCTATTTCCCATG                                                     |
| U6-gRNA-Fw-HindIII      | ACCCAAGCTTGAGGGCCTATTTCCCATG                                                     |
| U6-gRNA-Rv-AflIII       | GTGTACATGTACGCGCTAAAAACGGACTA                                                    |
| U6-gRNA-Rv-HindIII      | ACCCAAGCTTCACGCGCTAAAAACGGACTA                                                   |
| ODN-1                   | CAAAGTTGCTGTTAAGGACTGTATTATACCTAGGCACGCGAGCGGTTAGGGCTAACCTGGTTGCAAAGCCAGTCACTAG  |
| ODN-2                   | AAGTCTCAGGGTGAATTTGGTGAAGTCGATGAAGCCCTAACTGAGGCAGGAGAATTATCAGGAGTTCAAGGGCAGCTTGT |
| Copy-Num-ctrl-Pou5f1-fw | AAAGACACTGCTGAGGGCGA                                                             |
| Copy-Num-ctrl-Pou5f1-rv | AGACAGAAGCAGCAGCCAGT                                                             |
| Copy-Num-DE-fw          | TGGGAGGTGAGCATGACAGA                                                             |
| Copy-Num-DE-rv          | AGTCCCCTCCTTCTACCACATG                                                           |
| RT-Gapdh-fw             | TTGGGCTACACTGAGGACCA                                                             |
| RT-Gapdh-rv             | CCTGTTGCTGTAGCCGTATTCA                                                           |
| RT-Pou5f1-fw            | GCAGATCACTCACATCGCCA                                                             |
| RT-Pou5f1-rv            | AAGGTGTCCCTGTAGCCTCA                                                             |
| RT-Sox2-fw              | CGGCAGCTACAGCATGATGC                                                             |
| RT-Sox2-rv              | CTGCGAGCTGGTCATGGAG                                                              |
| RT-Nanog-fw             | GGATGAAGTGCAAGCGGTGG                                                             |
| RT-Nanog-rv             | GGCTTCCAGATGCGTTCACC                                                             |
| RT-Klf4-fw              | ATGCAGGCTGTGGCAAACC                                                              |
| RT-Klf4-rv              | TTTGGCGTAGTGCC TGGTCA                                                            |
| RT-Esrrb-fw             | GCTGGACCTTTACCGAGCCA                                                             |
| RT-Esrrb-rv             | CACCGCCTCCAGGTTCTCAA                                                             |
| RT-eRNA-D-fw            | CGCTGCCCTTTATTAGGCTTCCAACCTA                                                     |
| RT-eRNA-D-rv            | TCATGCTCACCTCCCAATTTCTATACA                                                      |
| RT-eRNA-U-fw            | ACAATCCATAAGACAAGGTTGGTATTGA                                                     |
| RT-eRNA-U-rv            | TTCAAGTATGCCTGCAGCCC                                                             |
